# Supplementary material
Source: publisher figshare collection journal article supplement (https://acs.figshare.com/ndownloader/files/15203999)
Supplement: Supplementary file 1 [file 15203999]

## **Supporting Information**

### **Robust and Thermally Stable Butterfly-Like $\text{Co}(\text{OH})_2$ / Hexadecyltrimethoxysilane Superhydrophobic Mesh Filters Prepared by Electrodeposition for Highly Efficient Oil/Water Separation**

Zhongde Wang,<sup>\*,†</sup> Wei Kong,<sup>†</sup> Lianxi Si,<sup>†</sup> Junjian Niu,<sup>†</sup> Ye Liu,<sup>†</sup>

Longping Yin<sup>†</sup>, and Zhigang Tian<sup>‡</sup>

<sup>†</sup>Department of Chemical Engineering, Taiyuan University of Technology, Taiyuan 030024, China

<sup>‡</sup>Shanxi Industrial Technology Development Research Center, Taiyuan 030072, China

Corresponding author

\*E-mail: wangzhongde@tyut.edu.cn or zdwangtyut@hotmail.com.

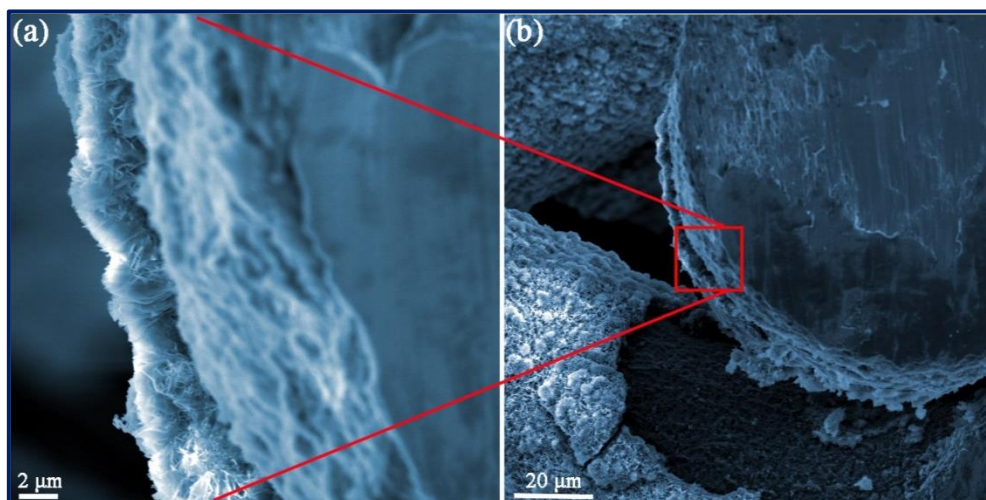

**Figure S1.** (a,b) Cross-sectional SEM images of the superhydrophobic and superoleophilic mesh filter.

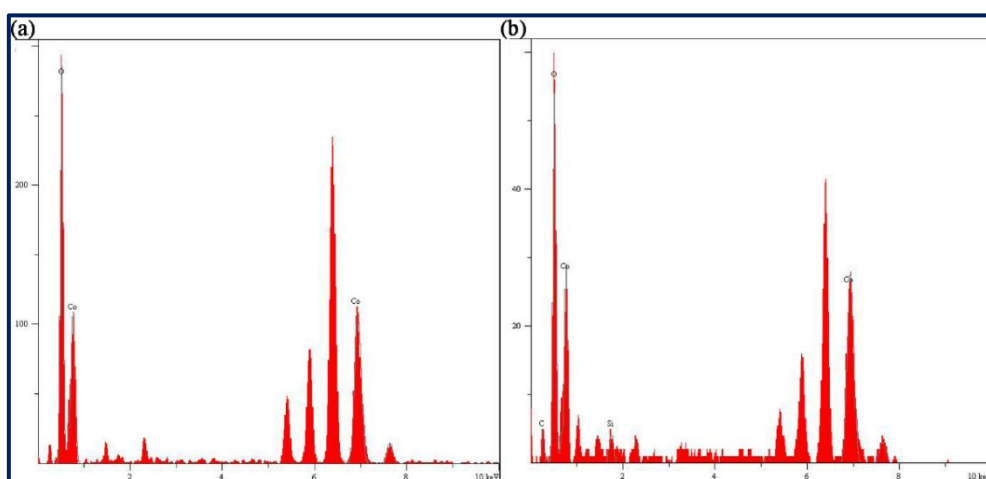

**Figure S2.** EDS spectrum of the materials on the SS mesh surfaces after (a) electrodeposition and (b) modification.

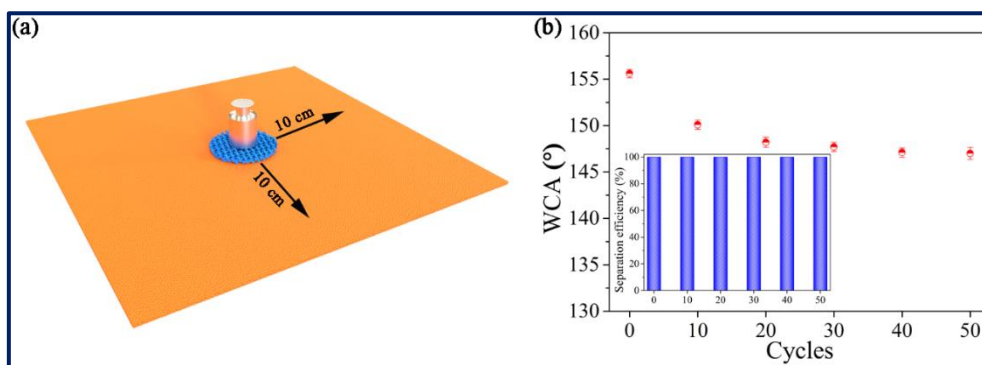

**Figure S3.** (a) Illustration of the experiment process for the mesh filter. (b) Influence of abrasion cycles on WCA and separation efficiency (for hexane/water mixtures) of the superhydrophobic and superoleophilic mesh filter.

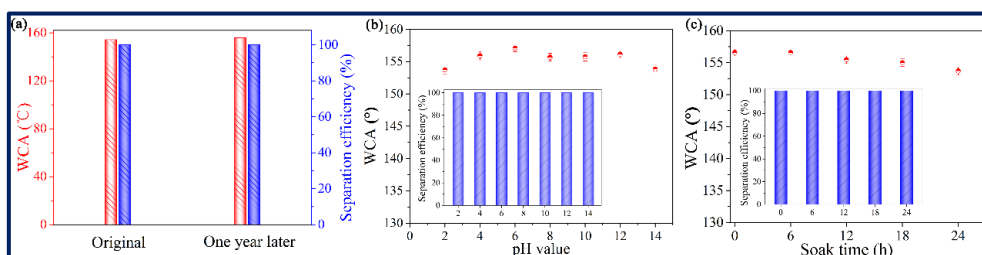

**Figure S4.** Influence of (a) storage time at room temperature, (b) pH value, and (c) soaking in simulated sea water (3.5 wt % NaCl solution), respectively, on WCA and separation efficiency (for hexane/water mixtures) of the superhydrophobic and superoleophilic mesh filter.
